# Supplementary material for: Piezomagnetism and magnetoelastic memory in uranium dioxide
Source: PubMed Central journal article supplement (PMC5524652; doi:10.1038/s41467-017-00096-4), 2017-07-24
Supplement: 41467_2017_96_MOESM1_ESM.pdf [file 41467_2017_96_MOESM1_ESM.pdf]

File name: Supplementary Information

Description: Supplementary Figures, Supplementary Notes and Supplementary References

File name: Peer Review File

Description:

## Supplementary Note 1: Piezomagnetism

The antiferromagnetic (AFM) transition at  $T_N = 30.8\text{K}$  in  $\text{UO}_2$  is of the first order [1]. The axial thermal expansion measured along the body diagonal [111],  $\varepsilon_a(T)$ , is shown in Supplementary Fig. 1a along with the magnetic susceptibility  $M/H(T)$  between  $T = 2\text{K}$  and room temperature. The magnetization was measured in a magnetic field of  $1\text{kOe}$ , in both field cooled (FC) and zero field cooled (ZFC) modes, with  $H$  applied along [111]. The AFM transition is clearly seen in both magnetic and lattice properties. The small upturn in the  $M/H(T)$  curve (FC, blue line) below  $T_N$  is not expected for a simple AFM system. A somewhat similar feature was observed before in  $\text{UO}_2$  under pressure, and attributed to

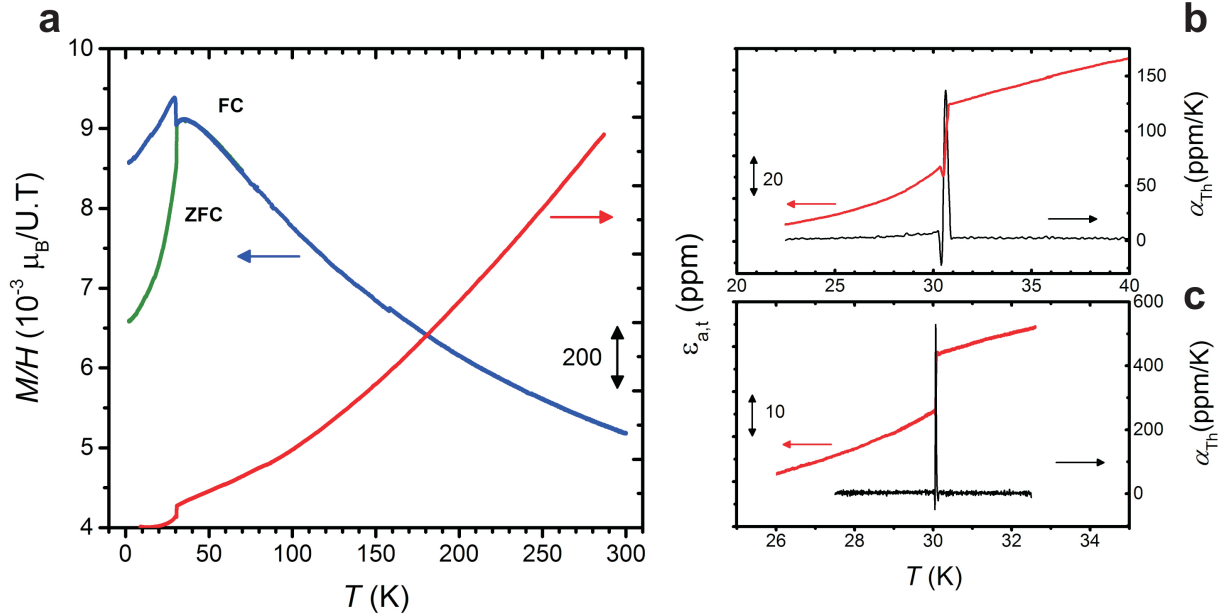

**Supplementary Figure 1: Thermal expansion and susceptibility versus temperature in  $\text{UO}_2$ .**

(a) Zero field  $\Delta L/L$  along [111] vs temperature (right y-axis) and magnetic susceptibility  $M/H$  in an external field of  $1\text{kOe}$  in FC and ZFC modes (left y-axis), measured between  $2\text{K}$  and room temperature. The antiferromagnetic transition is clearly visible. (b) and (c) Zero field  $\Delta L/L$  of  $\text{UO}_2$  vs temperature close to the AFM transition  $T_N \approx 30\text{K}$ , measured along (b) and transverse (c) to the [111] direction, respectively. The small difference in the observed transition temperatures could be due to the poor thermal conductivity of optical fibers. The coefficients of thermal expansion  $\alpha_{\text{Th}}(T)$  are plotted on the right hand side y-axes.

pressure-induced weak ferromagnetism [2]. Measurements in a field  $H = 5$  kOe, on the other hand, reproduce ambient pressure results [2]. Supplementary Figures 1a and c show the axial and transverse magnetostriction  $\varepsilon_a(T)$ , and  $\varepsilon_t(T)$ , close to the AFM transition. The drop at  $T_N$  supports reduction in the volume of the unit cell in agreement with earlier conclusions [3, 4]. Also shown are the coefficients of thermal expansion  $\alpha_a^T(T)$ , and  $\alpha_t^T(T)$  which are truly first-order like at  $T_N$ .

The observed linear magnetostriction (LMS) in the ordered state, precluded on the basis of time reversal symmetry considerations in most AFM materials, is strong in  $\text{UO}_2$ . The converse of the LMS phenomena is the piezomagnetic (PZM) effect. Borovik-Romanov [5] has considered the piezomagnetism from a phenomenological point of view, adding bilinear terms of magnetoelastic energy to the expansion of the thermodynamic potential per unit volume:

$$\Phi(T, \sigma, \mathbf{H}) = \Phi_0(T, \mathbf{H}) - \sum_{ijk} \Lambda_{ijk} H_i \sigma_{jk}, \quad (1)$$

where  $\sigma_{jk}$  are the components of the elastic strain tensor. If at least one term of this expansion remains invariant under the magnetic symmetry of the crystal, then the corresponding component axial  $\Lambda_{ijk}$  is not zero and hence the magnetization is given by

$$M_i = -\partial\Phi/\partial H_i = -\partial\Phi_0/\partial H_i + \sum_{jk} \Lambda_{ijk} \sigma_{jk}. \quad (2)$$

Thus, when a stress  $\sigma_{jk}$  is applied, a magnetic moment  $M_i$  linear in the stress is produced. It follows from Equation (1) that there exists also the LMS effect:

$$\epsilon_{jk} = -\partial\Phi/\partial\sigma_{jk} = \sum_i \Lambda_{ijk} H_i, \quad (3)$$

where  $\epsilon_{jk}$  are components of the deformation tensor.

The possibility of existence of LMS/PZM in a system is thus related with a non zero tensor  $\Lambda$  invariant under the symmetry operations of the magnetic point group of the crystal. There are a total of 122 magnetic point groups which are obtained by including the time reversal symmetry operation  $R$  to the 32 point groups. It follows from Equation (3) that systems where the operation  $R$  appears in the magnetic point group as an independent operation does not present LMS/PZM. The reason is that since  $H_i$  changes sign against time reversal

symmetry and the components of the deformation tensor  $\epsilon$  do not, then the third-rank axial tensor  $\mathbf{\Lambda}$  must reverse sign upon a time inversion transformation  $R$ , which cannot therefore be a symmetry element of the magnetically ordered lattice. There are 32 such groups and 24 more where LMS/PZM cannot take place for similar reasons.

The subset of 66 magnetic point groups that can indeed display PZM/LMS were listed by Tavger [6] and Briss [7]; the space group  $Pa\bar{3}$  ( $m\bar{3}$ ), used to describe the AFM state in  $UO_2$ , is among them (see Supplementary Ref. [8]).

The magnetostriction tensor for the magnetic space group  $Pa\bar{3}$ , point group  $m\bar{3}$  of  $UO_2$  in Voigt's notation is:

$$\mathbf{\Lambda} = \begin{vmatrix} 0 & 0 & 0 & \Lambda_{14} & 0 & 0 \\ 0 & 0 & 0 & 0 & \Lambda_{14} & 0 \\ 0 & 0 & 0 & 0 & 0 & \Lambda_{14} \end{vmatrix} \quad (4)$$

The dependence of the strain tensor with the applied magnetic field in Supplementary Equation (3) can be explicitly written as:

$$\epsilon = \Lambda_{14} \begin{vmatrix} 0 & H_z & H_y \\ H_z & 0 & H_x \\ H_y & H_x & 0 \end{vmatrix} \quad (5)$$

For an applied field  $H$  along the  $[111]$  direction, the strain tensor can be diagonalized to give

$$\epsilon = \frac{H\Lambda_{14}}{\sqrt{3}} \begin{vmatrix} -1 & 0 & 0 \\ 0 & -1 & 0 \\ 0 & 0 & 2 \end{vmatrix} \quad (6)$$

Where the first two directions are perpendicular and the third parallel to the  $[111]$  direction. We thus obtain  $\alpha_t = -\Lambda_{14}/\sqrt{3}$  and  $\alpha_a = 2\Lambda_{14}/\sqrt{3}$ , hence it follows that  $\alpha_a/\alpha_t = -2$ .

### Supplementary Note 2: The model Hamiltonian

We consider a classical Hamiltonian where the free degrees of freedom are the orientations of the magnetic moments of the four U atoms at the 4a positions in the  $Pa\bar{3}$  unit cell.

$$\hat{S}_i = S_0 [\sin \theta_i \cos \phi_i \hat{x} + \sin \theta_i \sin \phi_i \hat{y} + \cos \theta_i \hat{z}] \quad (7)$$

*Interaction with the magnetic field*

The Zeeman term gives the following contribution to the total energy:

$$\begin{aligned} H_Z &= -g\mu_B S_0 \bar{H} \cdot (\hat{S}_1 + \hat{S}_2 + \hat{S}_3 + \hat{S}_4) \\ &= -g\mu_B S_0 \sum_{i=1}^4 \sin \theta_i \cos \phi_i H_x + \sin \theta_i \sin \phi_i H_y + \cos \theta_i H_z \end{aligned} \quad (8)$$

If the magnetic field is applied along the (111) direction, one has:

$$H_x = H_y = H_z = \frac{H_0}{\sqrt{3}} \quad (9)$$

*Magnetic anisotropy*

The Jahn-Teller distortion stabilizes the 3- $\mathbf{k}$  magnetic order at  $T < T_N$  producing a local anisotropy that can be written as:

$$H_A = -AS_0^2 \sum_{i=1}^4 (\hat{S}_i \cdot \hat{v}_i)^2 = -A \frac{S_0^2}{3} \sum_{i=1}^4 (\sin \theta_i \cos \phi_i u_{ix} + \sin \theta_i \sin \phi_i u_{iy} + \cos \theta_i u_{iz})^2 \quad (10)$$

here  $u_{i\alpha} = \pm 1$  ( $i = 1, 4$  and  $\alpha = x, y, z$ ) are the sign of the projections along the Cartesian coordinates that specify the four directions of the magnetic moments in the 4a Wyckoff positions of the Pa $\bar{3}$  magnetic group.

This term is not enough to establish the relative orientation of the magnetic moments. A Heisenberg like interaction compatible with the symmetry operations of the magnetic group have to be included [10–12].

*Heisenberg interaction*

The Heisenberg contribution to the total energy, can be written as:

$$H_{SS} = -4JS_0^2 \sum_{1 \leq i < j \leq 4} \left[ S_{ix}(\hat{v}_i) S_{jx}(\hat{v}_j) + S_{iy}(\hat{v}_i) S_{jy}(\hat{v}_j) + S_{iz}(\hat{v}_i) S_{jz}(\hat{v}_j) \right] \quad (11)$$

where the  $S_{i\alpha}(\hat{v}_i)$  are the three components of the magnetic moments with the  $z$  component along  $\hat{v}_i$ .

*Elastic energy*

The elastic energy for a cubic crystal is:

$$H_{\text{el}} = \frac{a^3}{2} \left[ c_{11}(\epsilon_{xx}^2 + \epsilon_{yy}^2 + \epsilon_{zz}^2) + 2c_{12}(\epsilon_{xx}\epsilon_{yy} + \epsilon_{xx}\epsilon_{zz} + \epsilon_{yy}\epsilon_{zz}) + c_{44}(\epsilon_{xy}^2 + \epsilon_{xz}^2 + \epsilon_{yz}^2) \right] \quad (12)$$

where  $c_{11} = 389$  GPa,  $c_{12} = 119$  GPa,  $c_{44} = 60$  GPa,  $B = 1/3 (c_{11} + 2c_{12}) \simeq 207$  GPa, and  $a = 5.47\text{\AA}$ . Only shear components of the strain can be kept in the expression above because they are the only components appearing in the magnetoelastic term (see below) :

$$H_{\text{el}} = \frac{c_{44}}{2} a^3 (\epsilon_{xy}^2 + \epsilon_{xz}^2 + \epsilon_{yz}^2) \simeq 30.65 \text{ eV} (\epsilon_{xy}^2 + \epsilon_{xz}^2 + \epsilon_{yz}^2) \quad (13)$$

*Magnetoelastic energy*

To couple the elastic deformation to the magnetic order we include the magnetoelastic contribution (Supplementary eq. (1)) to the total energy :

$$H_{\text{me}} = -V \sum_{ijk} \Lambda_{ijk} H_i \sigma_{jk} \quad (14)$$

where  $V = a^3$ ,  $\Lambda$  is given by equation (4), and the magnetoelastic contribution now reads :

$$H_{\text{me}} = -a^3 \Lambda_{14} c_{44} [\epsilon_{yz} H_x + \epsilon_{xz} H_y + \epsilon_{xy} H_z] \quad (15)$$

where  $\Lambda_{14}$  is proportional to the staggered magnetization :

$$\Lambda_{14} = \frac{E}{c_{44} a^3} M_{\text{st}}, \quad (16)$$

$$M_{\text{st}} = \sum_{i=1}^4 \hat{S}_i \cdot \hat{v}_i \quad (17)$$

The minimization of the elastic and magnetoelastic contributions to the total energy gives :

$$\begin{aligned} \epsilon_{yz} &= \frac{E}{c_{44} a^3} M_{\text{st}} H_x \\ \epsilon_{xz} &= \frac{E}{c_{44} a^3} M_{\text{st}} H_y \\ \epsilon_{xy} &= \frac{E}{c_{44} a^3} M_{\text{st}} H_z \end{aligned} \quad (18)$$

The strain tensor for pure shear is

$$\epsilon = \begin{vmatrix} 0 & \epsilon_{xy}/2 & \epsilon_{xz}/2 \\ \epsilon_{xy}/2 & 0 & \epsilon_{yz}/2 \\ \epsilon_{xz}/2 & \epsilon_{xy}/2 & 0 \end{vmatrix} \quad (19)$$

In the case of a magnetic field along (111).  $\epsilon_{xy} = \epsilon_{xz} = \epsilon_{yz}$ , and the diagonalization of the strain tensor gives:

$$\epsilon_{111} = \epsilon_{xy}, \quad \text{and} \quad \epsilon_{100} = -\frac{\epsilon_{xy}}{2}. \quad (20)$$

Thus :

$$\epsilon_{111} = \frac{E}{\sqrt{3}c_{44}a^3} M_{\text{st}} H \quad (21)$$

To have the experimental  $\epsilon_{111} = \Delta L/L = 210 \cdot 10^{-6}$  at 20 Tesla,  $E \simeq 280 \cdot 10^{-6}$  eV/Tesla.

### Supplementary Note 3: Memory effect

On close inspection of Fig. 2a containing pulsed magnetic field data, and Fig. 2c (both in the main text of the paper) containing data taken in a slower superconducting magnet, we note a marked dependence of the coercive fields on field sweep rate. We further tested this behavior with measurements in two different pulsed magnets with sweep rates of 40 T/s and up to 10,000 T/s. The results are plotted in Supplementary Fig. 2, where we can see that the fastest sweep of 10000 T/s shown by curve 3 (red) results in a higher coercive field.

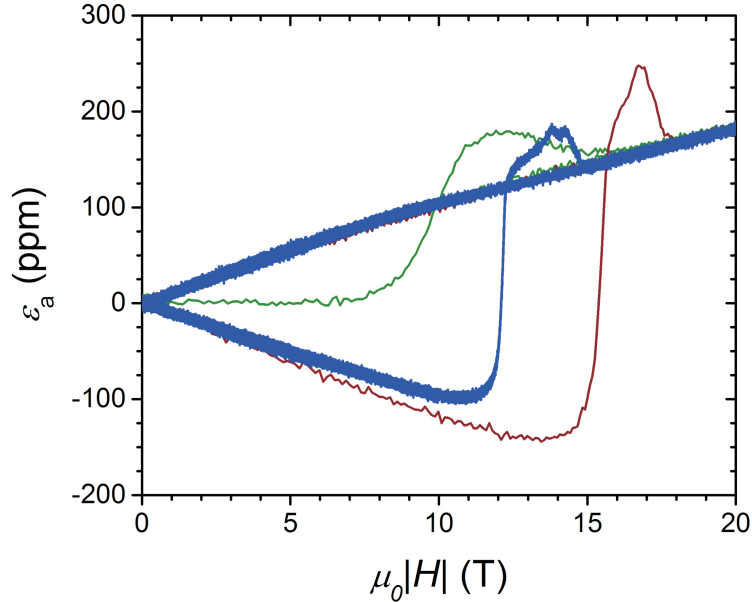

**Supplementary Figure 2: Memory effect in UO<sub>2</sub>.**

$\varepsilon_a(H)$  for  $\mathbf{H}$  along the [111] direction after zero field cooling the sample (green) compared with data obtained at an intermediate sweep rate of 40 T/s (blue) and at fast sweep rate of 10,000 T/s (red). This shows that the switching can be partial, allowing for tuning of  $d\varepsilon/dH$ . These characteristics make the gradual reorientation of magnetic moments a peculiar memory effect in UO<sub>2</sub>.

**SUPPLEMENTARY REFERENCES**

- 
- [1] Jones, W.M., Gordon, J., & Long, E.A. The heat capacities of Uranium, Uranium trioxide, and Uranium dioxide from 15K to 300K. *J. Chem. Phys.* **20** 695 (1952).
  - [2] Sakai, H., Kato, H., Tokunaga, Y., Kambe S., Walstedt, R.E., Nakamura, A., Tateiwa, N., & Kobayashi, T.C., Pressure-induced weak ferromagnetism in uranium dioxide, UO<sub>2</sub> *J.Phys.: Condens. Matter* **15** S2035 (2003).
  - [3] Brandt, O.G., & Walker C. T. Temperature dependence of elastic constants and thermal expansion for UO<sub>2</sub>. *Phys. Rev. Lett.* **18**, 11 (1967).
  - [4] White, G. K., & Sheard, F. W. The thermal expansion at low temperatures of UO<sub>2</sub> and



- UO<sub>2</sub>/ThO<sub>2</sub>. *J. Low Temp. Phys.* **14**, 445 (1974).
- [5] Borovik-Romanov, A.S. Piezomagnetism, Linear Magnetostriction and Magneto optic Effect *Ferroelectrics* **162**, 153 (1993).
- [6] Tavger, B.A. Symmetry of Piezomagnetic Crystals *Sov. Phys. Cryst.* **3**, 341 (1958).
- [7] Briss, R.R., & Anderson, J.C., Linear Magnetostriction in Antiferromagnetics *Proc. Phys. Soc.* **81**, 1139 (1963).
- [8] Litvin, D. B., *Magnetic Group Tables* (International Union of Crystallography, 2013)
- [9] Zvezdin A.K., *et al.*, Linear Magnetostriction and antiferromagnetic domain structure in dysprosium orthoferrite *Sov. Phys. JETP* **61**. 645 (1985).
- [10] Santini, P., Carretta, S., Amoretti, G., Caciuffo, R., Magnani, N., and Lander, G. H., Multipolar interactions in f-electron systems: The paradigm of actinide dioxides, *Rev. Mod. Phys.* **81**, 807-863 (2009).
- [11] Carretta, S., Santini, P., Caciuffo, R., and Amoretti, G., Quadrupolar waves in uranium dioxide, *Phys. Rev. Lett.* **105**, 167201 (2010).
- [12] Caciuffo, R., Santini, P., Carretta, S., Amoretti, G., Hiess, A., Magnani, N., Regnault, L. P., and Lander, G. H., Multipolar, magnetic, and vibrational lattice dynamics in the low-temperature phase of uranium dioxide. *Phys. Rev. B* **84**, 104409 (2011).
